# Supplementary material
Source: publisher figshare collection journal article supplement (https://karger.figshare.com/ndownloader/files/10986629)
Supplement: Supplementary file 1 [file 10986629]

Table S2. Change in dermal elasticity of twenty-one subjects over 4 weeks (Ur: immediate reaction, Ue: extensibility, Ur/Ue: net elasticity, * *p* < 0.05)
